# Supplementary material
Source: Springer Nature journal article supplement (https://www.springermedizin.de/resource/supplementary/13023_2013_570_MOESM12_ESM.pdf/9642780)

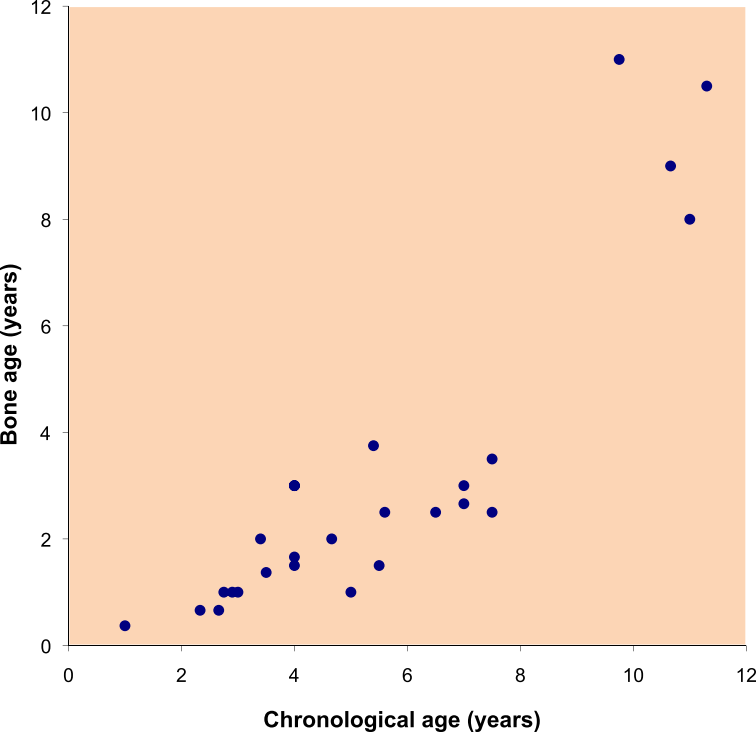

Supplement: MOESM12 [file 9642780]
